# Supplementary material for: Integration of carbon nanotubes and azo-coupled redox-active polymers into core–shell structured cathodes with favorable lithium storage
Source: Royal Society of Chemistry journal article supplement (doi:10.1039/d2ma00330a), 2022-01-01
Supplement: d2ma00330a1.pdf [file d2ma00330a1.pdf]

## ***Supplementary Information***

# **Integration of Carbon Nanotubes and Azo-Coupled Redox-Active Polymers into Core-Shell Structured Cathodes with Favorable Lithium Storage**

**Xiaolan Ma,<sup>a</sup> Yanying Dong,<sup>a</sup> Chengen He,<sup>\*b</sup> Nan Jiang,<sup>a</sup> and Yingkui Yang<sup>\*a</sup>**

*<sup>a</sup> Hubei Engineering Technology Research Centre of Energy Polymer Materials, School of Chemistry and Materials Science, South-Central Minzu University, Wuhan 430074, China*

*E-mail: [ykyang@mail.scuec.edu.cn](mailto:ykyang@mail.scuec.edu.cn)*

*<sup>b</sup> State Key Laboratory Cultivation Base for New Textile Materials and Advanced Processing Technology, School of Materials Science and Engineering, Wuhan Textile University, Wuhan 430200, China*

*E-mail: [cehe@wtu.edu.cn](mailto:cehe@wtu.edu.cn)*

### Theoretical capacity ( $C_{th}$ , mAh g<sup>-1</sup>) of NHP moieties

The  $C_{th}$  was calculated on the basis of the literature method reported elsewhere [*Adv. Mater.* 2019, 31, 1901478]. The equation can be expressed as  $C_{th} = F/(3.6 \times M_w)$ , where  $F$  is the Faraday constant (*ca.* 96485 C mol<sup>-1</sup>) which equals to  $e \times N_A$  ( $e$ , the charge of electron,  $1.60217662 \times 10^{-19}$  Coulombs;  $N_A$ , the Avogadro constant,  $6.022141 \times 10^{23}$  per mole).  $M_w$  is the equivalent molecular weight of organic active materials, and defined as molecular weights of the repeating unit cell divided with the number of electrons ( $n$ ) involved. As shown in Scheme S1, the molecular weight of the repeating *p*-phenylenediamine ( $M_A$ ) and tris(4-aminophenyl) amine ( $M_B$ ) units in NHP are 104, and 284, respectively. Based on the equimolar reaction between amino groups from *p*-phenylenediamine and tris(4-aminophenyl) amine monomers, the number of  $M_A$  and  $M_B$  units is 3 and 2 in the repeating NHP unit cell, respectively. The molecular weight of a unit cell is thus calculated to be  $M_{unit\ cell} = 3 \times M_A + 2 \times M_B = 3 \times 104 + 2 \times 284 = 880$ . Furthermore, in such a unit cell, the number of electrons involved is 8 (including six azo groups and two tertiary amine sites). Accordingly,  $M_w$  is 110 by using the equation of  $M_w = M_{unit\ cell}/n$  ( $880/8$ ). As a result, the  $C_{th}$  is about 243.6 mAh g<sup>-1</sup> using the above equation.

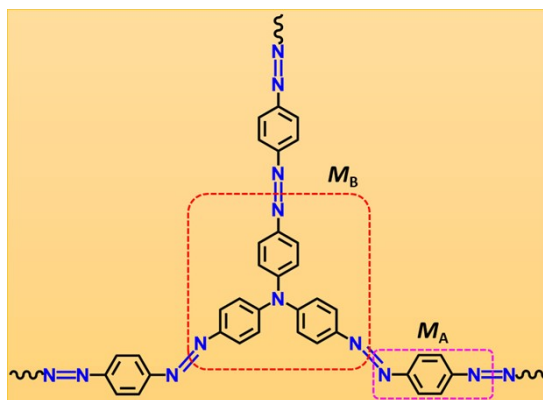

**Scheme S1** Chemical structures of  $M_A$  and  $M_B$  units in the NHP moiety.

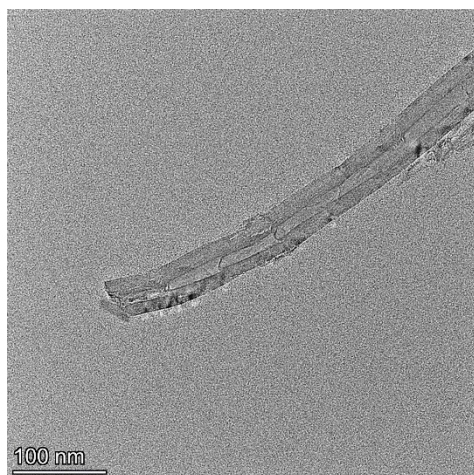

**Fig. S1** Typical TEM image of bare CNTs

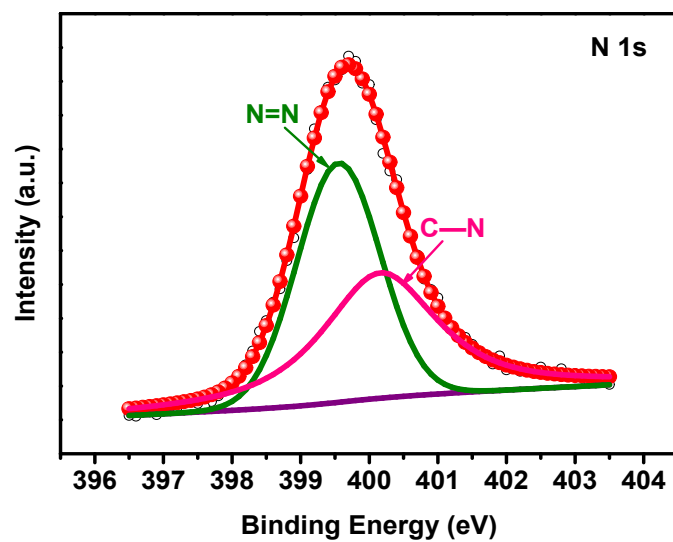

**Fig. S2** High-resolution N1s XPS spectrum of NHP moieties.

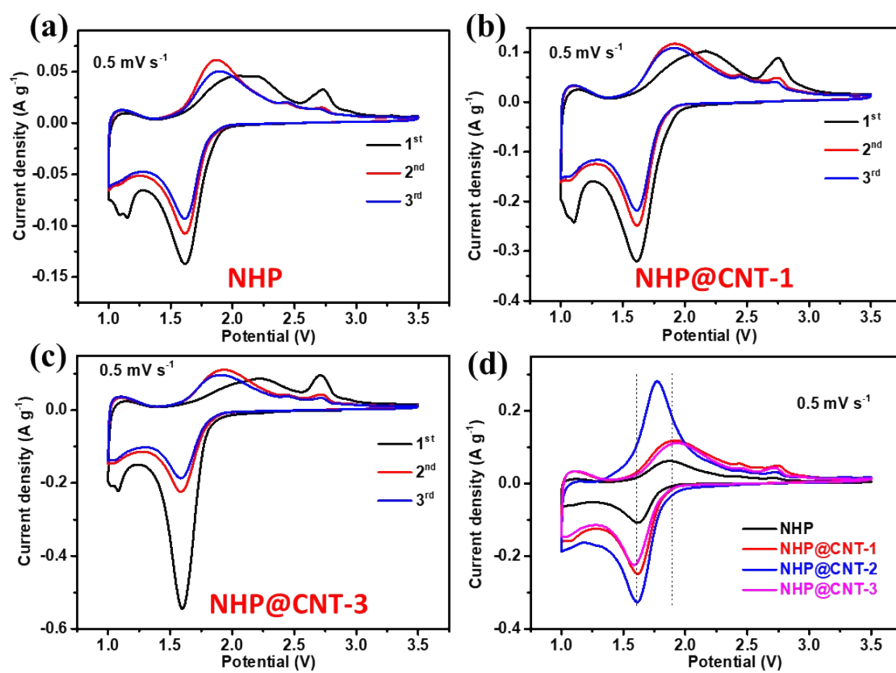

**Fig. S3** CV curves of (a) NHP, (b) NHP@CNT-1, and (c) NHP@CNT-3 cathodes measured at  $0.5 \text{ mV s}^{-1}$  in the first three cycles; (d) stable CV profiles of NHP and NHP@CNTs cathodes at  $0.5 \text{ mV s}^{-1}$  in the third cycle.

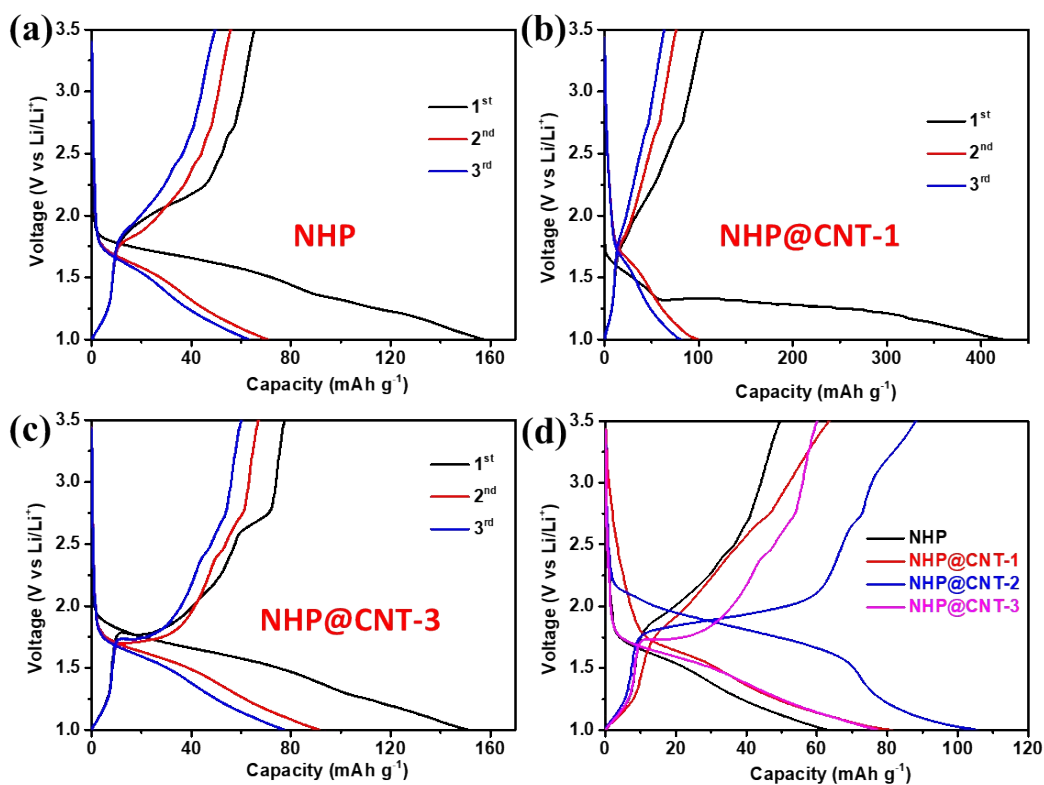

**Fig. S4** Charge/discharge voltage profiles of (a) NHP, (b) NHP@CNT-1, and (c) NHP@CNT-3 cathodes measured at 0.05 A g<sup>-1</sup> in the first three cycles; (d) stable charge/discharge voltage profiles of NHP and NHP@CNTs cathodes at 0.05 A g<sup>-1</sup> in the third cycle.

**Table S1.** Elemental contents of NHP and NHP@CNTs obtained from elemental analysis

| <b>Sample</b> | <b>N<br/>(wt%)</b> | <b>C<br/>(wt%)</b> | <b>H<br/>(wt%)</b> |
|---------------|--------------------|--------------------|--------------------|
| Pure NHP      | 15.7               | 64.9               | 4.0                |
| NHP@CNT-1     | 13.0               | 67.8               | 3.6                |
| NHP@CNT-2     | 11.5               | 75.3               | 3.4                |
| NHP@CNT-3     | 8.3                | 78.9               | 2.5                |
| Pure CNTs     | 0.03               | 97.6               | 0.01               |
